# Supplementary material for: Evaluation of hemolysis, lipemia, and icterus interference with common clinical immunoassays
Source: publisher site journal article supplement (doi:10.1515/cclm-2022-0924), 2023-01-13
Supplement: Supplementary file 1 [file j_cclm-2022-0924_suppl.docx]

**Supplementary Materials for Evaluation of hemolysis, lipemia, and icterus interference with common clinical immunoassays**

Short title: Impact of HIL on clinical immunoassays

Authors: Amir Karin1,2,3, Victoria Higgins1,4,5, Jessica Miller6, Davor Brinc6,7, Vathany Kulasingam6,7, Rajeevan Selvaratnam6,7*

1Equal contributions

**Supplementary Table**

## Table S1. Concentration and Index Equivalents on the Abbott Alinity c

| **Hemolysis** | | |
| --- | --- | --- |
| Index | Concentration Range in g/L | Concentration Range in mg/dL |
| 0 | < 0.30 | < 30 |
| 1+ | 0.30 - 0.99 | 30 - 99 |
| 2+ | 1.00 - 1.99 | 100 - 199 |
| 3+ | 2.00 - 4.99 | 200 - 499 |
| 4+ | ≥5.00 | ≥500 |
| **Icterus** | | |
| Index | Concentration Range in μmol/L | Concentration Range in mg/dL |
| 0 | <34.2 | <2.0 |
| 1+ | 34.2 - 68.3 | 2.0 – 3.9 |
| 2+ | 68.4 - 170.9 | 4.0 – 9.9 |
| 3+ | 171.0 - 341.9 | 10.0 – 19.9 |
| 4+ | ≥342.0 | ≥20 |
| **Lipemia** | | |
| Index | Concentration Range in mmol/L | Concentration Range in mg/dL |
| 0 | <0.57 | <50 |
| 1+ | 0.57 - 1.12 | 50 – 99 |
| 2+ | 1.13 - 1.69 | 100 – 149 |
| 3+ | 1.70 - 2.25 | 150 – 199 |
| 4+ | ≥2.26 | ≥200 |

## Table S2. Within Run Precision (Repeatability) and Reference Intervals Applied

| **Assay** | ***Within-run Coefficient of Variation (CV)** | | **Reference Intervals1** |
| --- | --- | --- | --- |
| **Mean** | **%CV** |
| AFP | 28.5 | 2.4 | 0.89 – 8.78 μg/L |
| 118 | 2.0 |
| 233 | 2.1 |
| Anti-TPO | 48 | 2.4 | < 5.61 IU/mL |
| 129 | 2.5 |
| 303 | 2.7 |
| B-hCG | 3.3 | 7.8 | ≥ 25 mIU/mL |
| 22.1 | 4.1 |
| 413.2 | 2.3 |
| BNP | 67.7 | 4.4 | < 100 pg/mL |
| 343.9 | 3.3 |
| 1491.4 | 2.1 |
| CA125 | 35 | 2.5 | < 35.0 U/mL |
| 94 | 2.1 |
| 268.4 | 1.9 |
| Cortisol | 114.5 | 3.1 | Before 10 am: 102.1 -535.2 nmol/L  After 5pm: 80.0 – 477.3 nmol/L |
| 473.5 | 1.8 |
| 839.6 | 1.8 |
| C-Peptide | 315.0 | 2.9 | 260 – 1730 pmol/L |
| 1408.8 | 1.9 |
| 3978.6 | 2.1 |
| DHEA-S | 2.1 | 2.7 | | Age (years) | 5-95th Percentile (μmol/L) | | --- | --- | | Females |  | | 11-14 | 0.2-4.6 | | 15-19 | 1.7-13.4 | | 20-24 | 3.6-11.1 | | 25-34 | 2.6-13.9 | | 35-44 | 2.0-11.1 | | 45-54 | 1.5-7.7 | | 55-64 | 0.8-4.9 | | 65-70 | 0.9-2.1 | | Males |  | | 11-14 | 0.5-6.6 | | 15-19 | 1.2-10.4 | | 20-24 | 6.5-14.6 | | 25-34 | 4.6-16.1 | | 35-44 | 3.8-13.1 | | 45-54 | 3.7-12.1 | | 55-64 | 1.3-9.8 | | 65-70 | 6.2-7.7 | |
| 4.4 | 2.1 |
| 17.6 | 2.2 |
| Estradiol | 156 | 7.9 | | Males | 40 -162 pmol/L | | --- | --- | | Normally Menstruating Females |  | | Follicular Phase: | 77 –921 pmol/L | | Mid-Cycle Peak: | 139-2382 pmol/L | | Luteal Phase: | 77-1145 pmol/L | | Post-Menopausal Females not on hormone therapy: | <37 – 103 pmol/L | | Postmenopausal females on HRT: | <37 – 529 pmol/L | |
| 952 | 2.4 |
| 2097.8 | 2.1 |
| Ferritin | 29 | 3.1 | Males: 21.8 -274.7 μg/L  Females: 4.6 – 204.0 μg/L |
| 224 | 3.0 |
| 504 | 3.2 |
| 6.9 | 5.2 |
| Folate* | 31.2 | 2.5 | 7.0-46.4 nmol/L |
| 177.9 | 2.8 |
| 380.7 | 4.5 |
| Free PSA | 0.16 | 3.3 | Interpreted in conjunction with total PSA, when total PSA is between 4-10 μg/L; free PSA: total PSA > 0.26 |
| 2.46 | 3.0 |
| 18.98 | 5.3 |
| Total PSA | 0.19 | 4.1 | ≤ 4.0 μg/L |
| 0.10 | 4.1 |
| 2.96 | 4.4 |
| 21.1 | 4.6 |
| Homocysteine | 4.6 | 3.3 | Males: 5.46 -16.20 μmol/L  Females: 4.44 – 13.56 μmol/L |
| 11 | 2.5 |
| 23.9 | 2.5 |
| Free T3 | 3.7 | 4.5 | 2.9 – 4.9 pmol/L |
| 8.4 | 2.3 |
| 16.0 | 2.4 |
| Free T4 | 11.6 | 1.8 | 9.0 – 19.0 pmol/L |
| 26.0 | 2.7 |
| FSH | 9.9 | 2.4 | | Males | 0.95-11.95 (IU/L) | | --- | --- | | Normally Menstruating Females |  | | Follicular Phase: | 3.03-8.08 (IU/L) | | Mid-Cycle Peak: | 2.55-16.69 (IU/L) | | Luteal Phase: | 1.38-5.47 (IU/L) | | Post-Menopausal Females: | 26.72-133.41 (IU/L) | |
| 17.2 | 2.3 |
| 39.0 | 2.4 |
| hsTnI | 16 | 4.5 | Females: >15.6 ng/L  Males: >34.2 ng/L |
| 1743 | 2.3 |
| 7300 | 2.1 |
| Insulin | 101 | 2.1 | Fasting: 13-142 pmol/L* |
| 434 | 1.8 |
| 1182 | 1.3 |
| LH | 4.1 | 2.1 | | Males | 0.57-12.07 (IU/L) | | --- | --- | | Normally Menstruating Females |  | | Follicular Phase: | 1.80-11.78 (IU/L) | | Mid-Cycle Peak: | 7.59-89.08 (IU/L) | | Luteal Phase: | 0.56-14.00 (IU/L) | | Post-Menopausal Females not on hormone therapy: | 5.16-61.99 (IU/L) | |
| 16.8 | 1.9 |
| 53.2 | 1.7 |
| Progesterone | 2.6 | 3.1 | | Males | <0.32-0.64 nmol/L | | --- | --- | | Normally Menstruating Females |  | | Follicular Phase: | 0.32-0.95 nmol/L | | Luteal Phase: | 3.82-50.56 nmol/L | | Post-Menopausal Females | <0.32-0.64 nmol/L | | Pregnant Females |  | | 1st Trimester | 8.90-468.41 nmol/L | | 2nd Trimester | 71.55-303.05 nmol/L | | 3rd Trimester | 88.72-771.15 nmol/L | |
| 25.8 | 2.9 |
| 49.0 | 1.7 |
| Prolactin | 9.8 | 2.0 | Males: 3.46-19.40 μg/L  Females: 5.18-26.53 μg/L |
| 22.4 | 1.9 |
| 62.2 | 2.1 |
| iPTH | 3.8 | 2.6 | 1.59-7.24 pmol/L |
| 37.0 | 2.1 |
| 120.4 | 2.1 |
| SHBG | 8.6 | 3.8 | Males: 17.1 – 77.6 nmol/L  Premenopausal women: 34.3 – 147.7 nmol/L  Postmenopausal women: 26.4 – 118 – nmol/L |
| 24.3 | 3.6 |
| 141.9 | 4.3 |
| Testosterone | 3.3 | 3.6 | Males (21-49 years of age): 8.33 – 30.19 nmol/L  Males(≥50 years of age): 7.66 – 24.82 nmol/L |
| 14.8 | 3.1 |
| 30.4 | 3.1 |
| TSH | 0.70 | 1.9 | 0.35-4.94 mIU/L |
| 4.83 | 2.0 |
| 24.09 | 1.9 |
| VitaminB12 | 376 | 3.6 | 138-652 pmol/L |
| 502.1 | 3.5 |
| 123.6 | 6.7 |
| 220.9 | 4.2 |
| Vitamin D | 198 | 3.1 | 16.5 – 124.8 nmol/L |
| 81 | 2.7 |
| 17 | 4.5 |
| 36 | 3.3 |
| 1Source of reference intervals are packager inserts unless otherwise indicated by *.  **Source of within run CV: in-house studies obtained as part of total imprecision studies, by running quality control materials at various levels in duplicate, twice per day for 20 days (n = 80 points per QC level). | | | |

**Supplementary Figures**

**
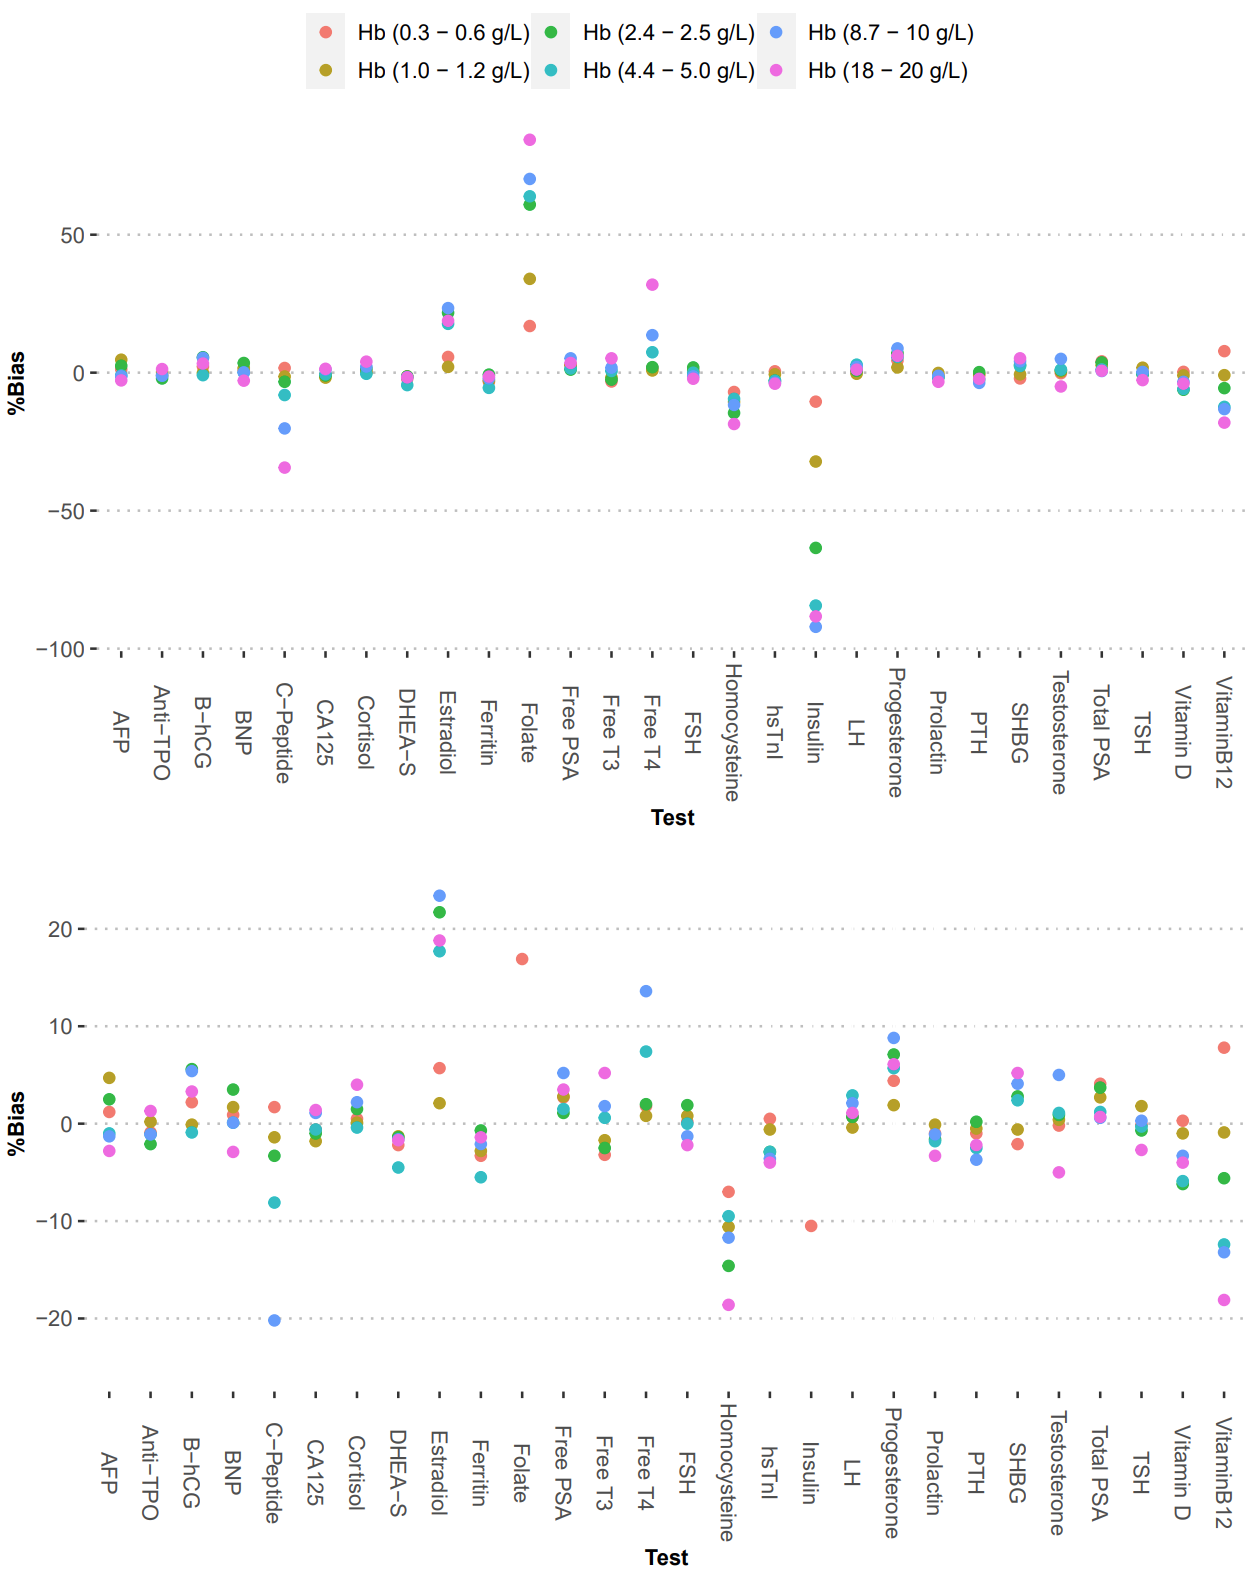
Supplementary Figure 1:**  Effect of Hemolysis on Abbott Alinity i immunoassays. A) Mean bias relative to baseline concentration for a given test at various concentrations of Hb, as noted in the legend. Plot is scaled to visualize the maximum (positive or negative) bias observed. B) Same as A, but the plot is scaled to visualize trends within 土25% bias.


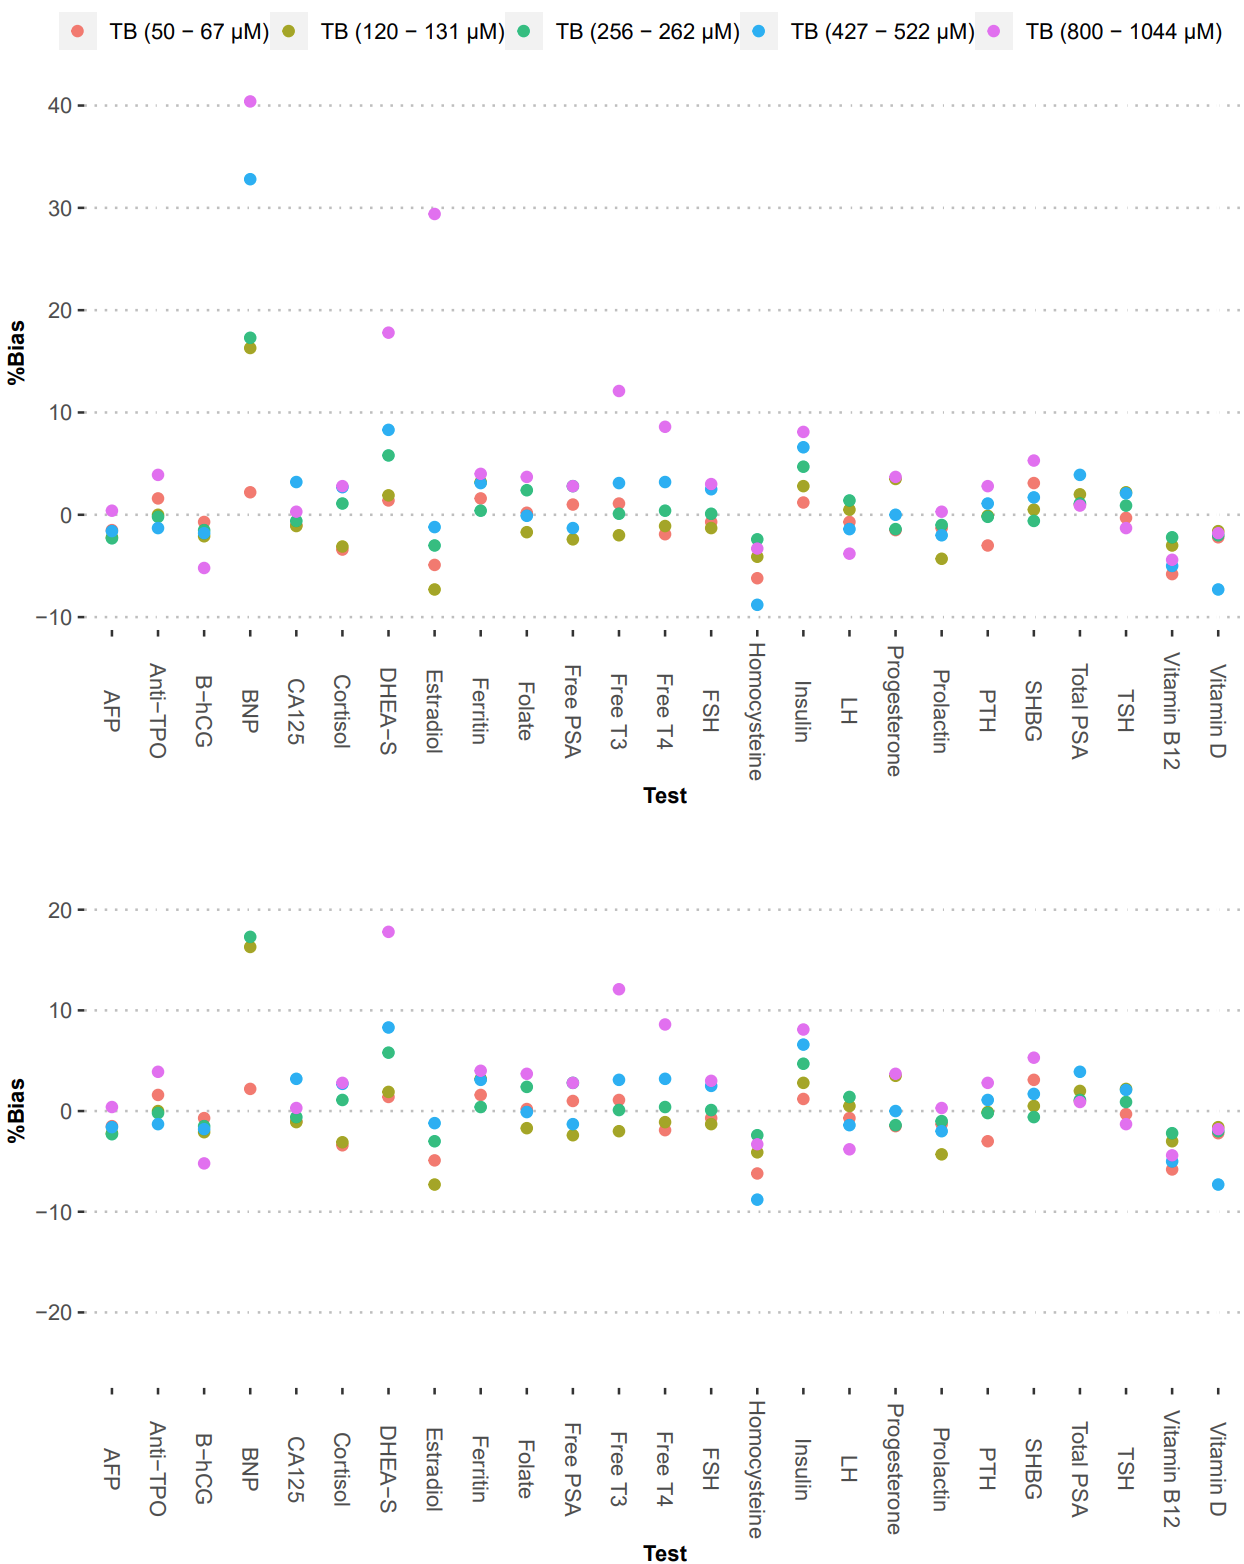


**Supplementary Figure 2:** Effect of icterus on IA tests on the Abbott Alinity i. A) Mean bias relative to baseline concentration for a given test at various spiked concentrations of conjugated bilirubin as noted in the legend. Plot is scaled to visualize the maximum (positive or negative) bias observed. B) Same as A, but the plot is scaled to visualize trends within 土25% bias.

**
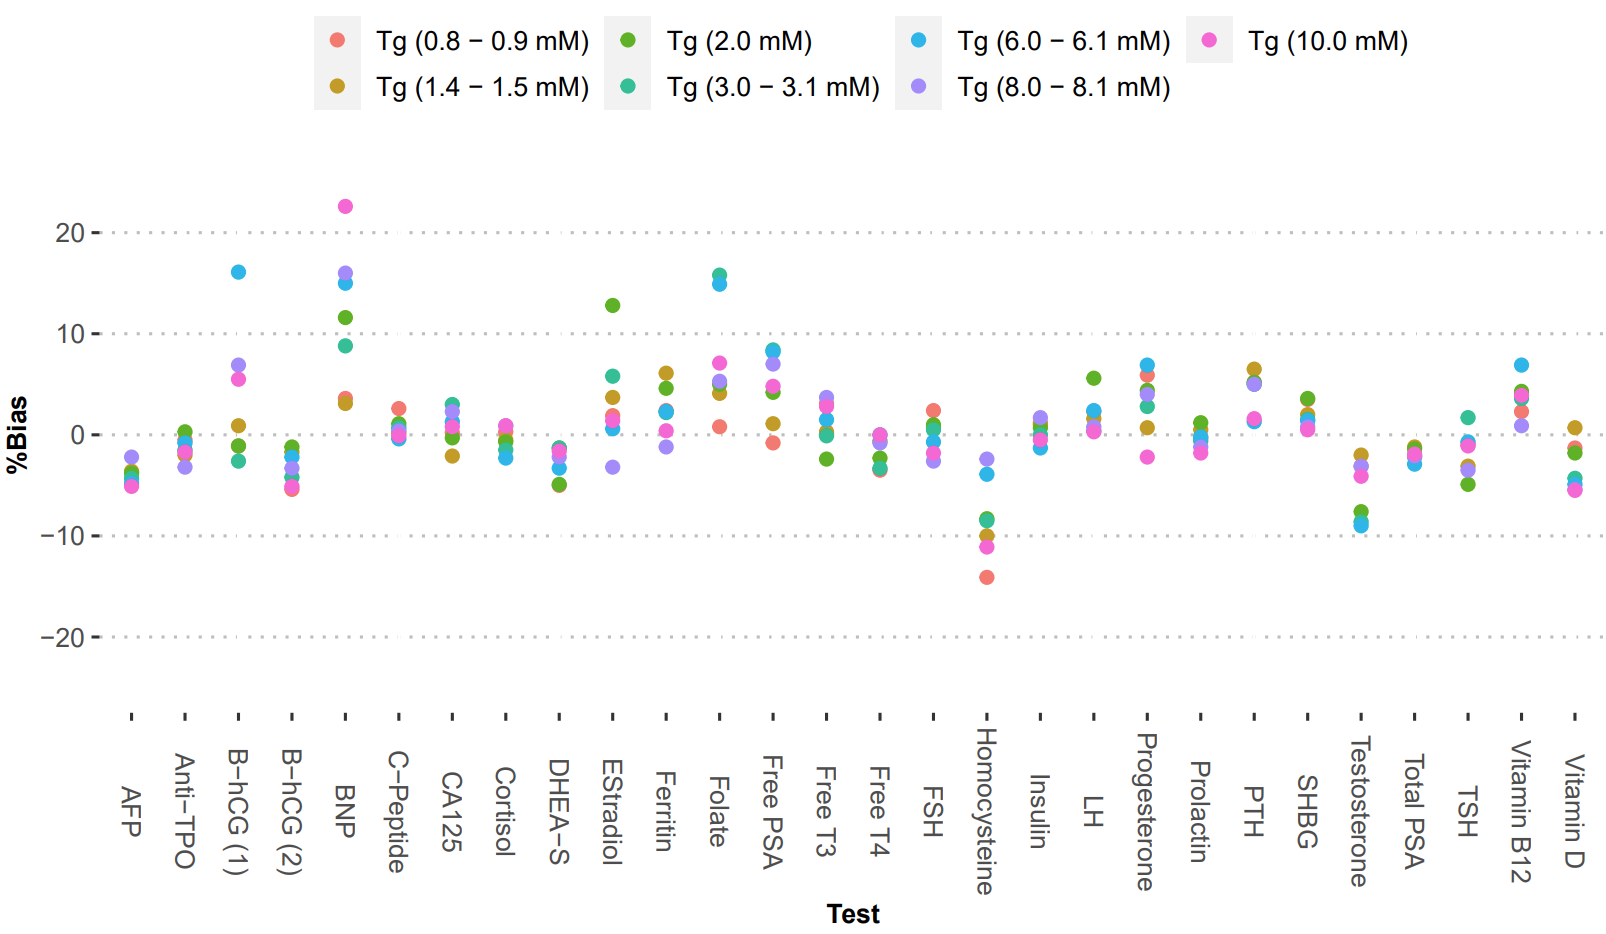
**

**Supplementary Figure 3:** Effect of lipemia on IA tests on the Abbott Alinity *i*. A) Mean bias relative to baseline concentration for a given test at various spiked concentrations of Intralipid, measured by the triglyceride (Tg) assay on the Abbott Architect c as noted in the legend.


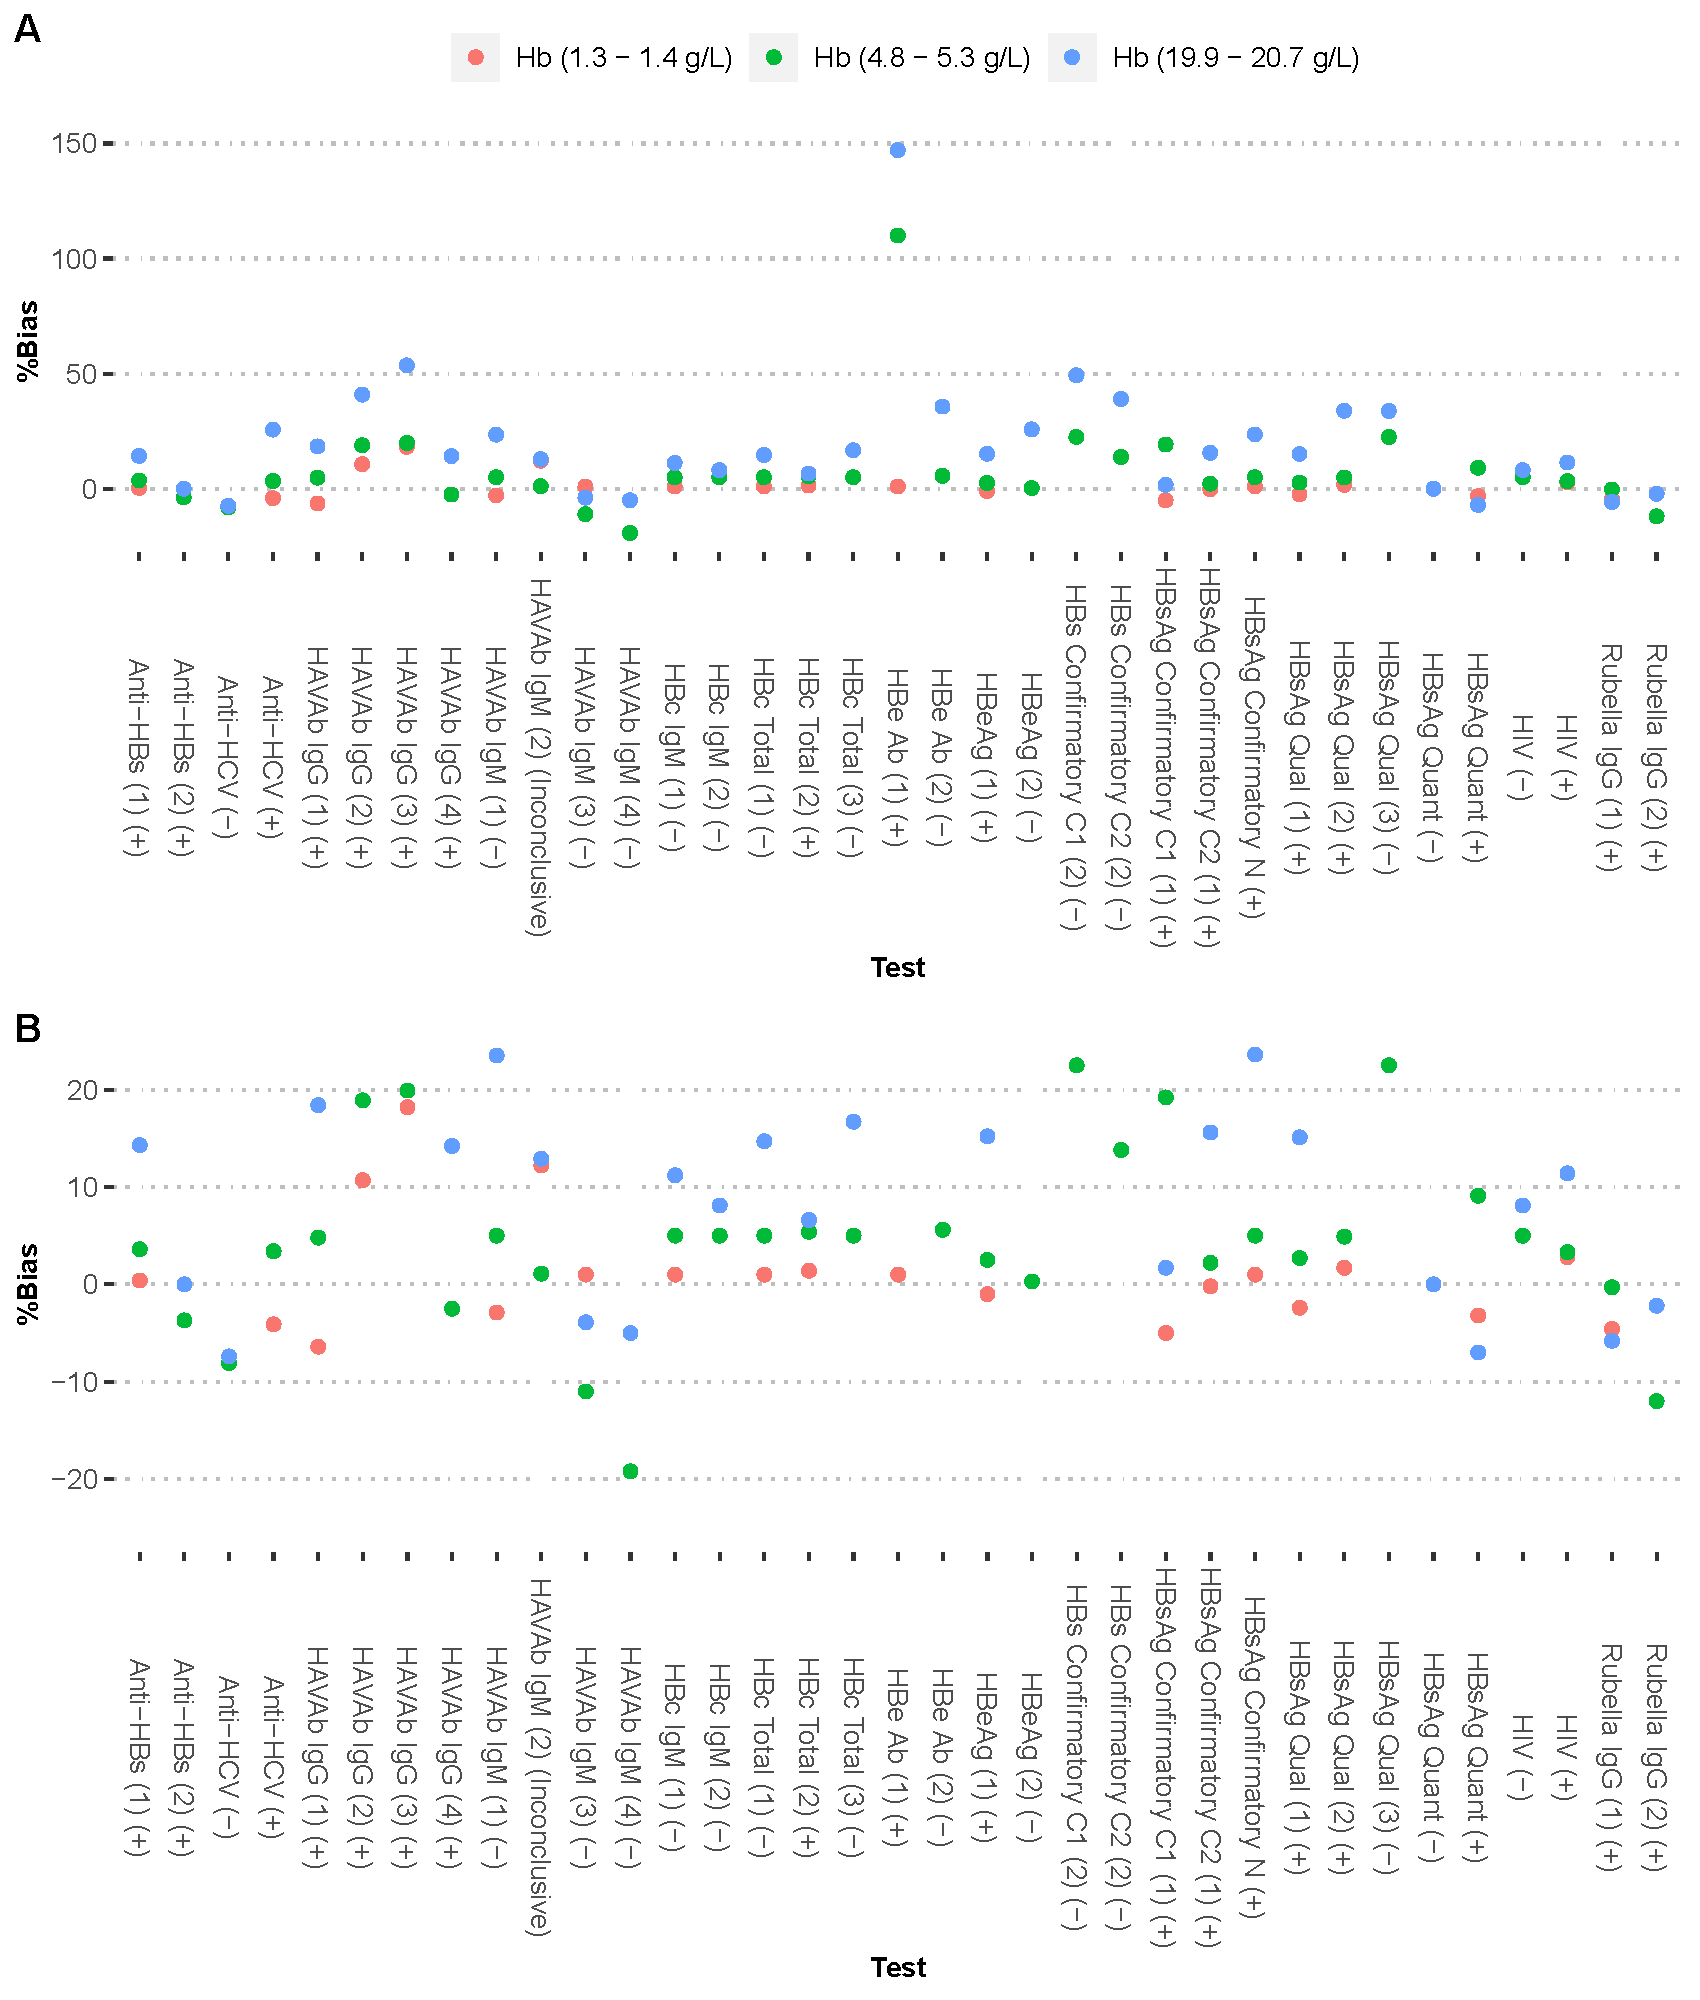


**Supplementary Figure 4:** Effect of hemolysis on various serology tests on the Abbott Alinity i. Top panel: Mean bias relative to baseline concentration for a given test at various concentrations of Hb, as noted in the legend. Plot is scaled to visualize the maximum (positive or negative) bias observed. Bottom Panel: Same as above, but the plot is scaled to visualize trends within 土25% bias.


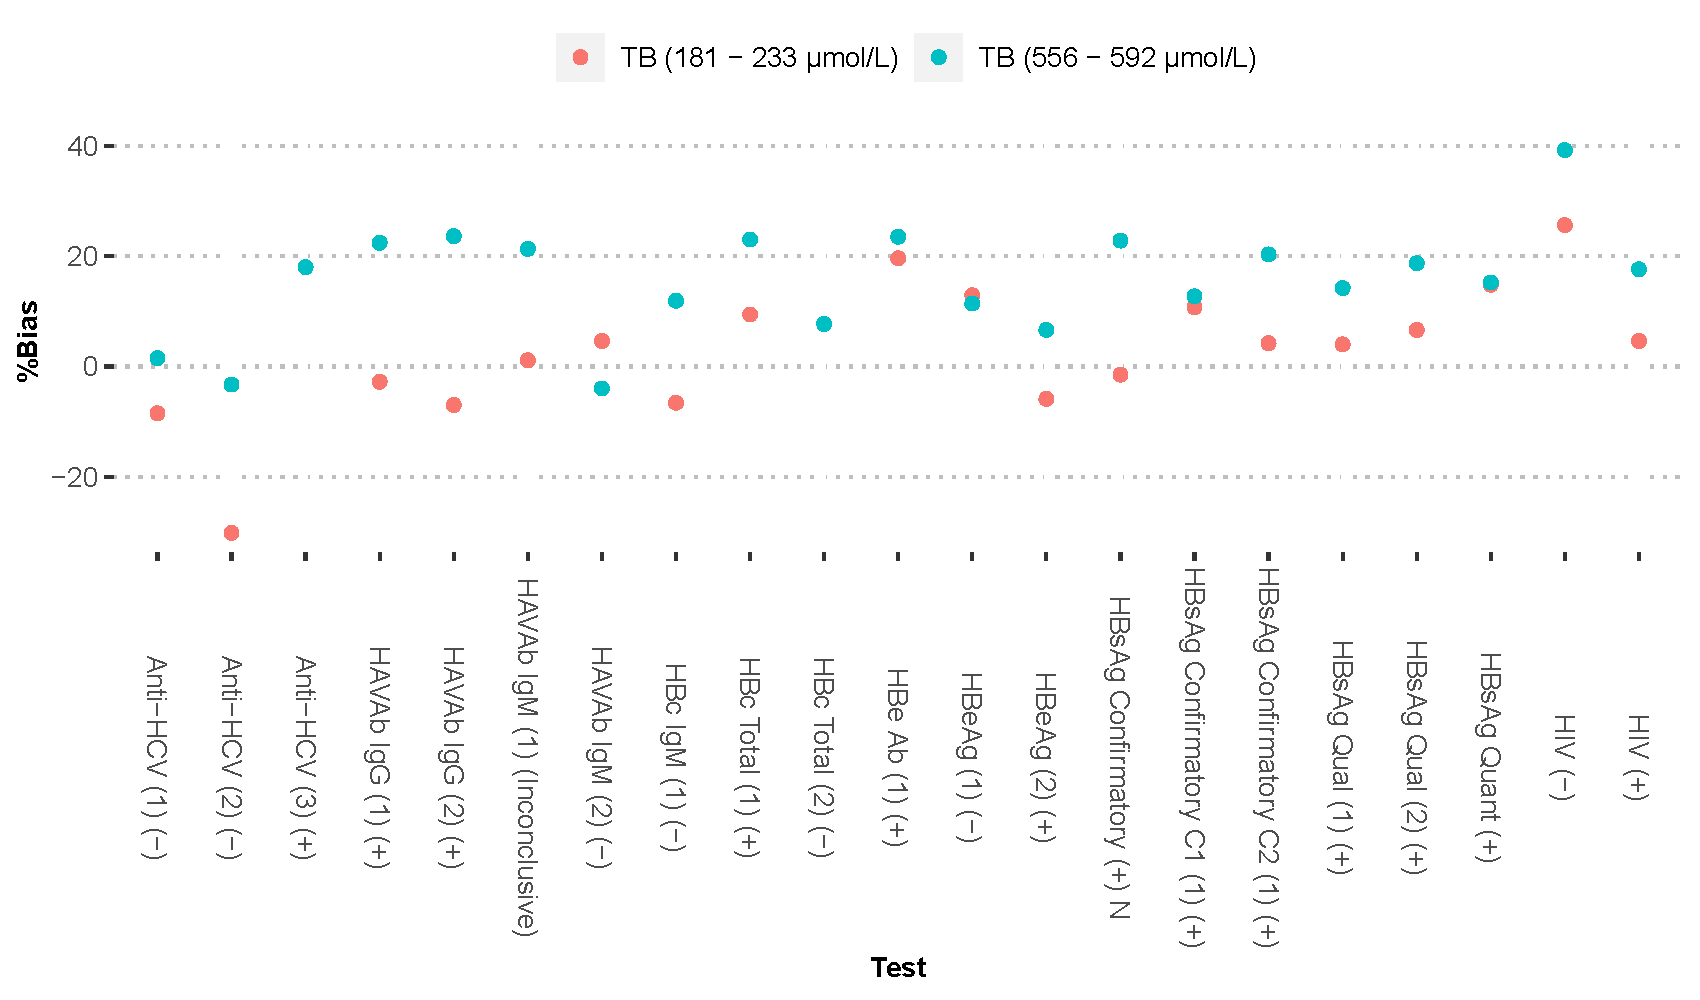


**Supplementary Figure 5:** Effect of icterus on serology tests on the Abbott Alinity i. A) Mean bias relative to baseline concentration for a given test at various spiked concentrations of conjugated bilirubin as noted in the legend. Plot is scaled to visualize the maximum (positive or negative) bias observed. B) Same as A, but the plot is scaled to visualize trends within 土25% bias.
